# Supplementary material for: CXCL9, a promising biomarker in the diagnosis of chronic Q fever
Source: Springer Nature journal article supplement (doi:10.1186/s12879-017-2656-6), 2017-08-09
Supplement: MOESM2 [file 13448698]

**Supplementary Table 1 Diagnostic parameters of the chronic Q fever patient cohort**

| <b>Patient</b> | <b>Chronic Q fever diagnosis</b> | <b>PCR blood/tissue</b> | <b>IgG phase I at diagnosis</b> | <b>CRP at diagnosis (mg/L)</b> | <b>CXCL9 (pg/ml)</b> |
|----------------|----------------------------------|-------------------------|---------------------------------|--------------------------------|----------------------|
| 1              | proven                           | positive                | 32768                           | 5                              | 12734                |
| 2              | proven                           | positive                | 2048                            | unknown/nd                     | 10170                |
| 3              | proven                           | positive                | 4096                            | unknown/nd                     | 4978                 |
| 4              | proven                           | positive                | 131072                          | 22                             | 4295                 |
| 5              | proven                           | positive                | unknown                         | unknown/nd                     | 3250                 |
| 6              | proven                           | unknown                 | 32768                           | unknown/nd                     | 3052                 |
| 7              | proven                           | positive                | 8192                            | unknown/nd                     | 2464                 |
| 8              | proven                           | unknown                 | 2048                            | unknown/nd                     | 2248                 |
| 9              | proven                           | positive                | 32768                           | 15                             | 2206                 |
| 10             | proven                           | positive                | 8192                            | unknown/nd                     | 2088                 |
| 11             | proven                           | positive                | 32768                           | 5                              | 1808                 |
| 12             | proven                           | negative                | 65536                           | 58                             | 1496                 |
| 13             | proven                           | unknown                 | 1024                            | unknown/nd                     | 1215                 |
| 14             | proven                           | negative                | 65536                           | unknown/nd                     | 1080                 |
| 15             | proven                           | positive                | 4096                            | unknown/nd                     | 1056                 |
| 16             | proven                           | positive                | 4096                            | unknown/nd                     | 1038                 |
| 17             | proven                           | negative                | 1024                            | 34                             | 990                  |
| 18             | proven                           | positive                | unknown                         | unknown/nd                     | 930                  |
| 19             | proven                           | positive                | 1024                            | unknown/nd                     | 926                  |
| 20             | proven                           | positive                | 8192                            | 6                              | 900                  |
| 21             | proven                           | negative                | unknown                         | 93                             | 886                  |
| 22             | proven                           | unknown                 | 2048                            | unknown/nd                     | 837                  |
| 23             | proven                           | unknown                 | unknown                         | unknown/nd                     | 824                  |
| 24             | proven                           | positive                | 8192                            | unknown/nd                     | 782                  |
| 25             | proven                           | positive                | 4096                            | unknown/nd                     | 775                  |
| 26             | proven                           | positive                | 4096                            | unknown/nd                     | 724                  |
| 27             | proven                           | positive                | unknown                         | unknown/nd                     | 698                  |
| 28             | proven                           | positive                | 32768                           | 5                              | 672                  |
| 29             | proven                           | positive                | 65536                           | 5                              | 612                  |
| 30             | proven                           | positive                | 4096                            | unknown/nd                     | 589                  |
| 31             | proven                           | positive                | 8192                            | unknown/nd                     | 583                  |
| 32             | proven                           | positive                | unknown                         | 5                              | 542                  |
| 33             | proven                           | unknown                 | 32768                           | unknown/nd                     | 484                  |
| 34             | proven                           | positive                | 131072                          | 5                              | 394                  |
| 35             | proven                           | positive                | 8192                            | 5                              | 307                  |
| 36             | proven                           | positive                | 2048                            | unknown/nd                     | 213                  |
| 37             | proven                           | negative                | 8096                            | unknown/nd                     | 207                  |
| 38             | proven                           | negative                | 1024                            | 5                              | 92                   |
| 39             | probable                         | unknown                 | 1024                            | unknown/nd                     | 2778                 |
| 40             | probable                         | negative                | 4096                            | unknown/nd                     | 1741                 |
| 41             | probable                         | unknown                 | 16384                           | 30                             | 1009                 |
| 42             | probable                         | negative                | 2048                            | unknown/nd                     | 934                  |

---

|    |          |          |       |            |     |
|----|----------|----------|-------|------------|-----|
| 43 | probable | negative | 512   | unknown/nd | 929 |
| 44 | probable | negative | 512   | unknown/nd | 899 |
| 45 | probable | unknown  | 16384 | unknown/nd | 553 |
| 46 | probable | negative | 4096  | unknown/nd | 550 |
| 47 | probable | negative | 32768 | unknown/nd | 443 |
| 48 | probable | negative | 4096  | 5          | 409 |
| 49 | probable | negative | 8192  | unknown/nd | 297 |
| 50 | probable | unknown  | 8192  | unknown/nd | 295 |
| 51 | probable | unknown  | 4096  | unknown/nd | 191 |

---

*Supplementary table 1. Diagnostic characteristics of chronic Q fever patient cohort. Abbreviations: unknown/nd: unknown or not determined.*
